# Supplementary material
Source: PubMed Central journal article supplement (PMC4007628)

# Supplementary Figure 1

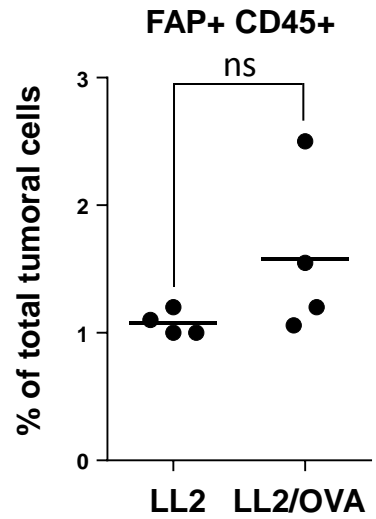

Supplement: NIHMS55748-supplement-2.pdf [file NIHMS55748-supplement-2.pdf]

# Supplementary Figure 2

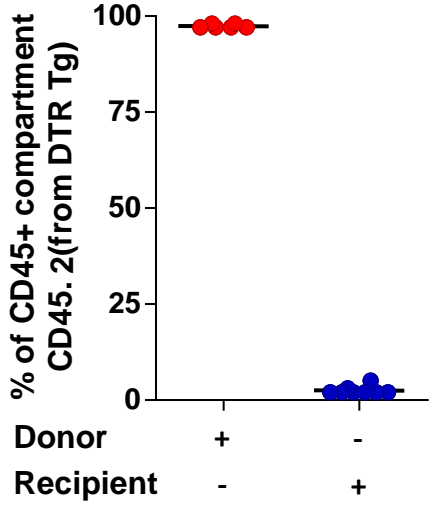

Supplement: NIHMS55748-supplement-3.pdf [file NIHMS55748-supplement-3.pdf]

# Supplementary Figure 3

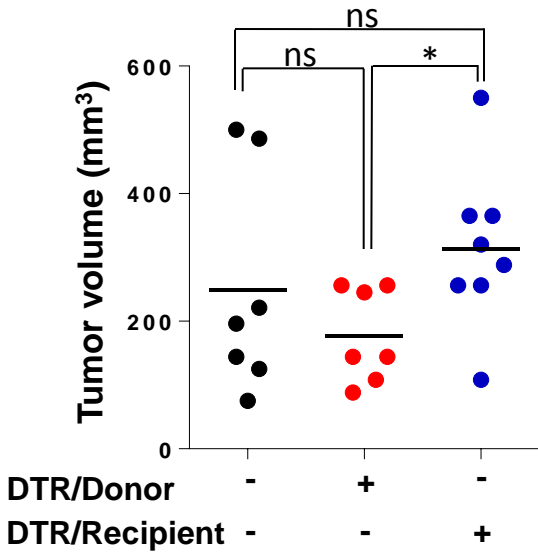

Supplement: NIHMS55748-supplement-4.pdf [file NIHMS55748-supplement-4.pdf]

# Supplementary Figure 4

FAP

F4/80

HO-1

Merge

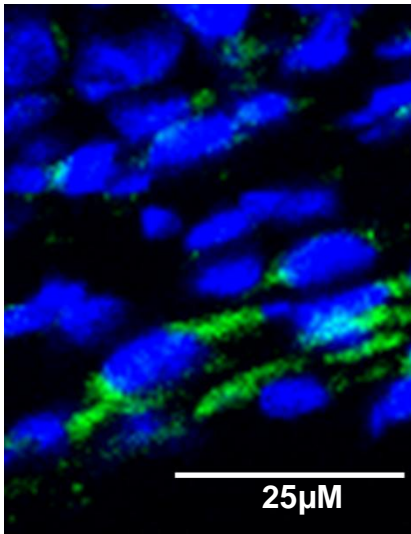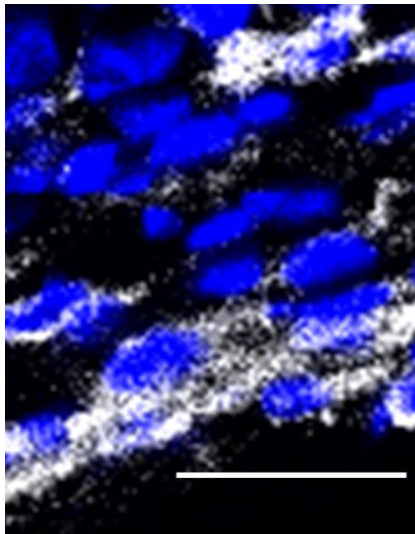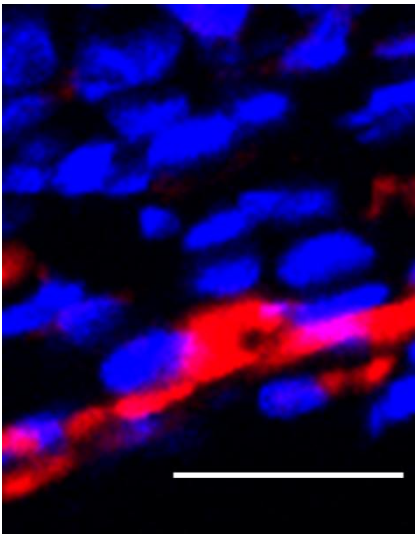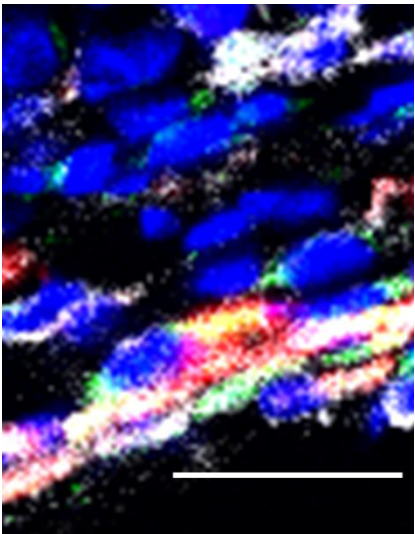

Supplement: NIHMS55748-supplement-5.pdf [file NIHMS55748-supplement-5.pdf]

# Supplementary Figure 5

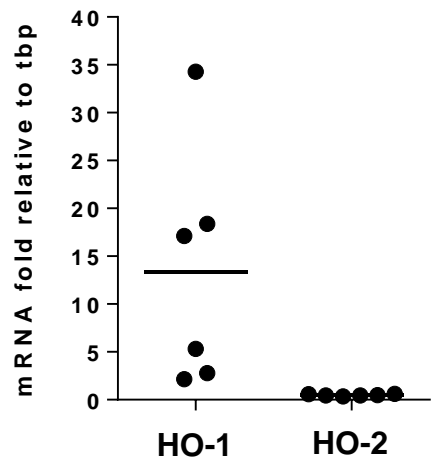

Supplement: NIHMS55748-supplement-6.pdf [file NIHMS55748-supplement-6.pdf]

# Supplementary Figure 6

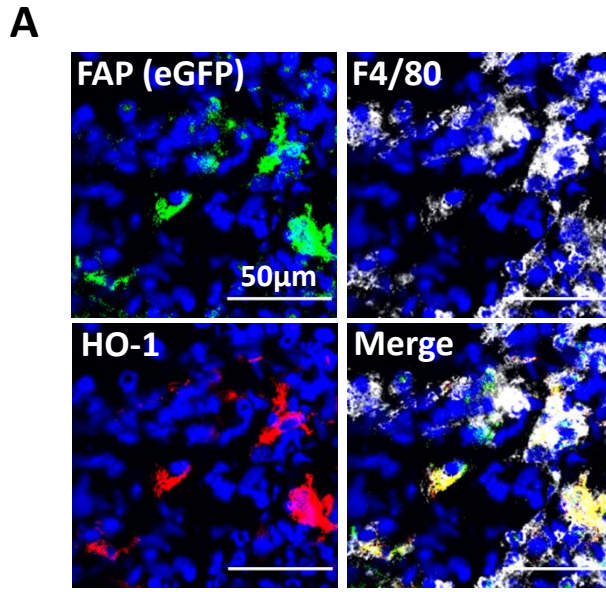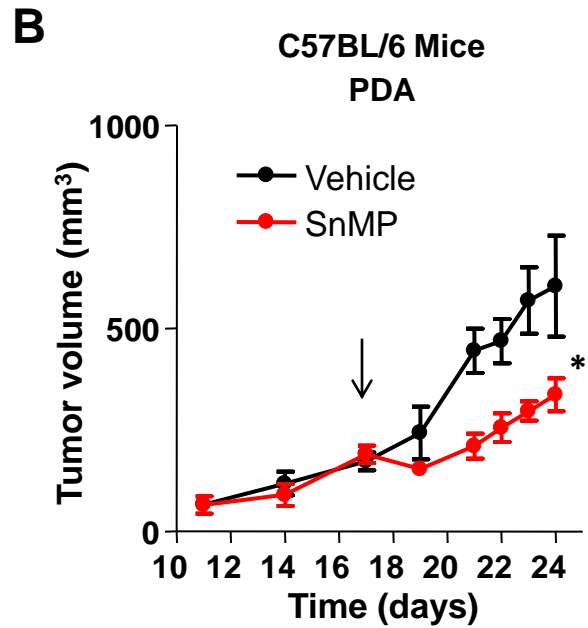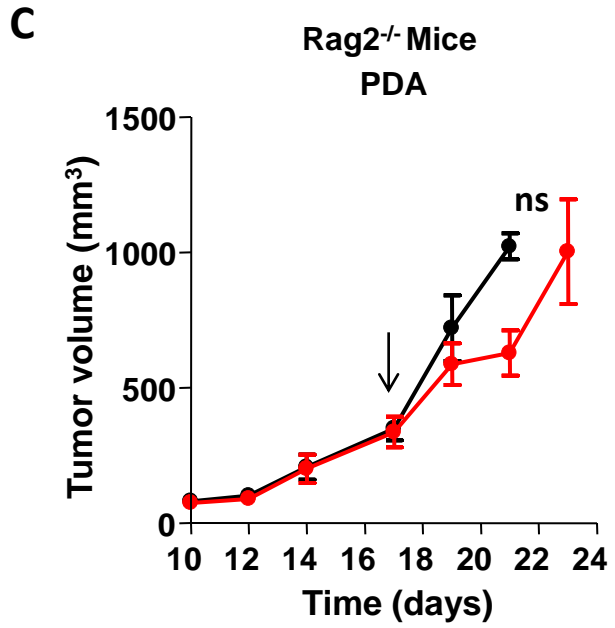

Supplement: NIHMS55748-supplement-7.pdf [file NIHMS55748-supplement-7.pdf]

# Supplementary Figure 7

**A**

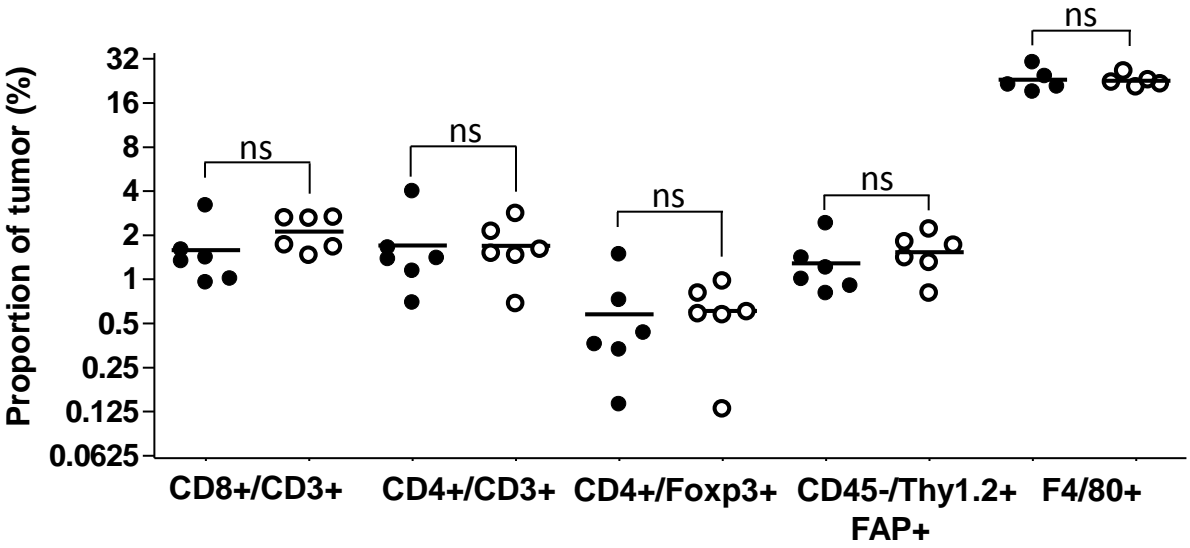

**B**

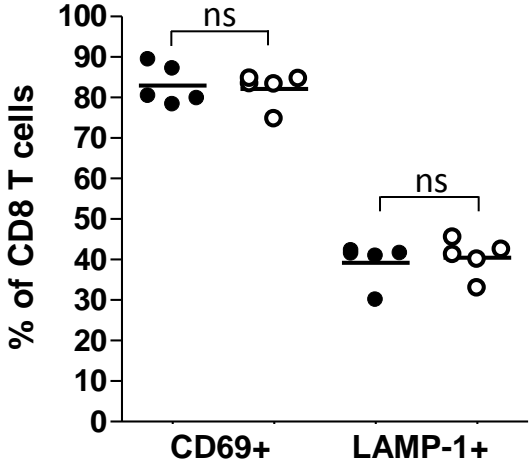

Supplement: NIHMS55748-supplement-8.pdf [file NIHMS55748-supplement-8.pdf]

# Supplementary Figure 8

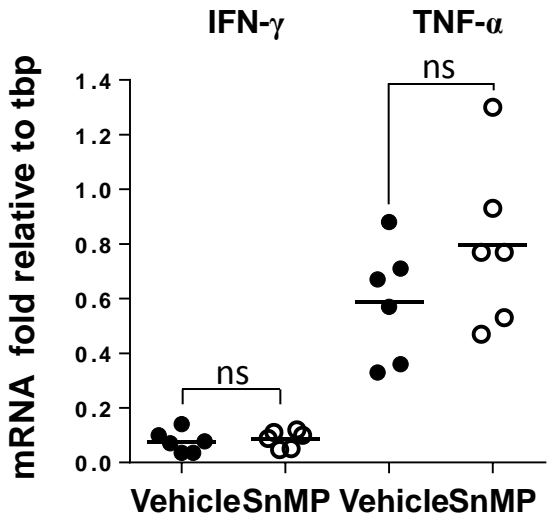

Supplement: NIHMS55748-supplement-9.pdf [file NIHMS55748-supplement-9.pdf]
